# Supplementary material for: Single point mutations can potentially enhance infectivity of SARS-CoV-2 revealed by in silico affinity maturation and SPR assay
Source: Royal Society of Chemistry journal article supplement (doi:10.1039/d1ra00426c), 2021-01-01
Supplement: d1ra00426c1.pdf [file d1ra00426c1.pdf]

## Supporting Information

### Single point mutations can potentially enhance infectivity of SARS-CoV-2 revealed by in silico affinity maturation and SPR assay

Ting Xue,<sup>a#</sup> Weikun Wu,<sup>b#</sup> Ning Guo,<sup>b</sup> Chengyong Wu,<sup>a</sup> Jian Huang,<sup>b</sup> Lipeng Lai,<sup>b</sup> Hong Liu,<sup>a</sup> Yalun Li,<sup>a</sup> Tianyuan Wang,<sup>b\*</sup> and Yuxi Wang,<sup>a\*</sup>

<sup>a</sup> Targeted Tracer Research and Development Laboratory, Precision Medicine Research Center, Department of Respiratory and Critical Care Medicine, West China Hospital, Sichuan University, Chengdu 610041, P.R. China

<sup>b</sup> XtalPi - AI Research Center (XARC), 9F, Tower A, Dongsheng Building, No.8, Zhongguancun East Road, Haidian District, Beijing 100083, P.R. China

<sup>#</sup>These authors contributed equally to this work.

# Contents

**Figure S1.** Schematic of the flex ddG protocol, modified from the flex ddG paper.

**Table S1.** List of the sample name on the SDS-PAGE figure corresponding to the mutants.

**Figure S2.** SDS-PAGE result of the 10 spike protein RBD mutants.

**Table S2.** SPR result of RBD-WT and 10 mutants.

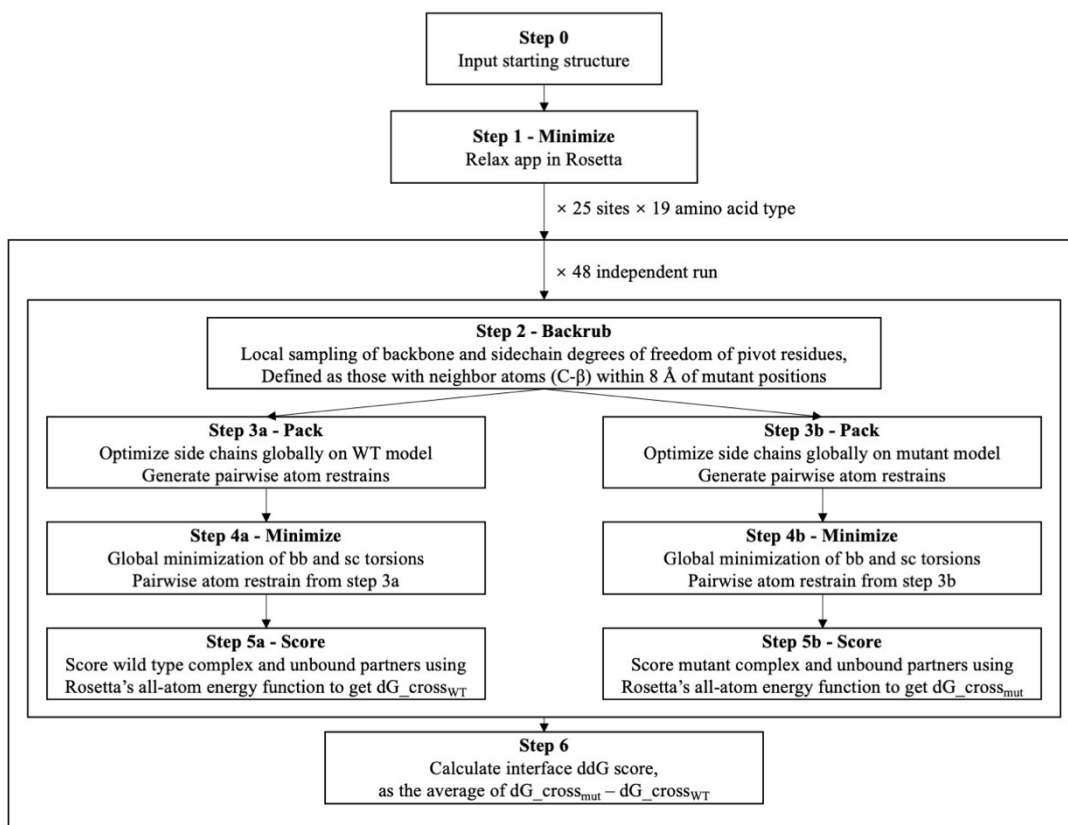

**Figure S1. Schematic of the flex ddG protocol, modified from the flex ddG paper.**

**Table S1. List of the sample name on the SDS-PAGE figure corresponding to the mutants.**

| <b>Sample name on the SDS-PAGE figure</b> | <b>Mutant</b> |
|-------------------------------------------|---------------|
| <b>P101154-1</b>                          | RBD-Q498W     |
| <b>P101154-2</b>                          | RBD-Q498R     |
| <b>P101154-3</b>                          | RBD-T500W     |
| <b>P101154-4</b>                          | RBD-S477H     |
| <b>P101154-5</b>                          | RBD-Y505W     |
| <b>P101154-6</b>                          | RBD-T500R     |
| <b>P101154-7</b>                          | RBD-N501V     |
| <b>P101154-8</b>                          | RBD-Y489W     |
| <b>P101154-9</b>                          | RBD-Q493M     |
| <b>P101154-10</b>                         | RBD-L455A     |

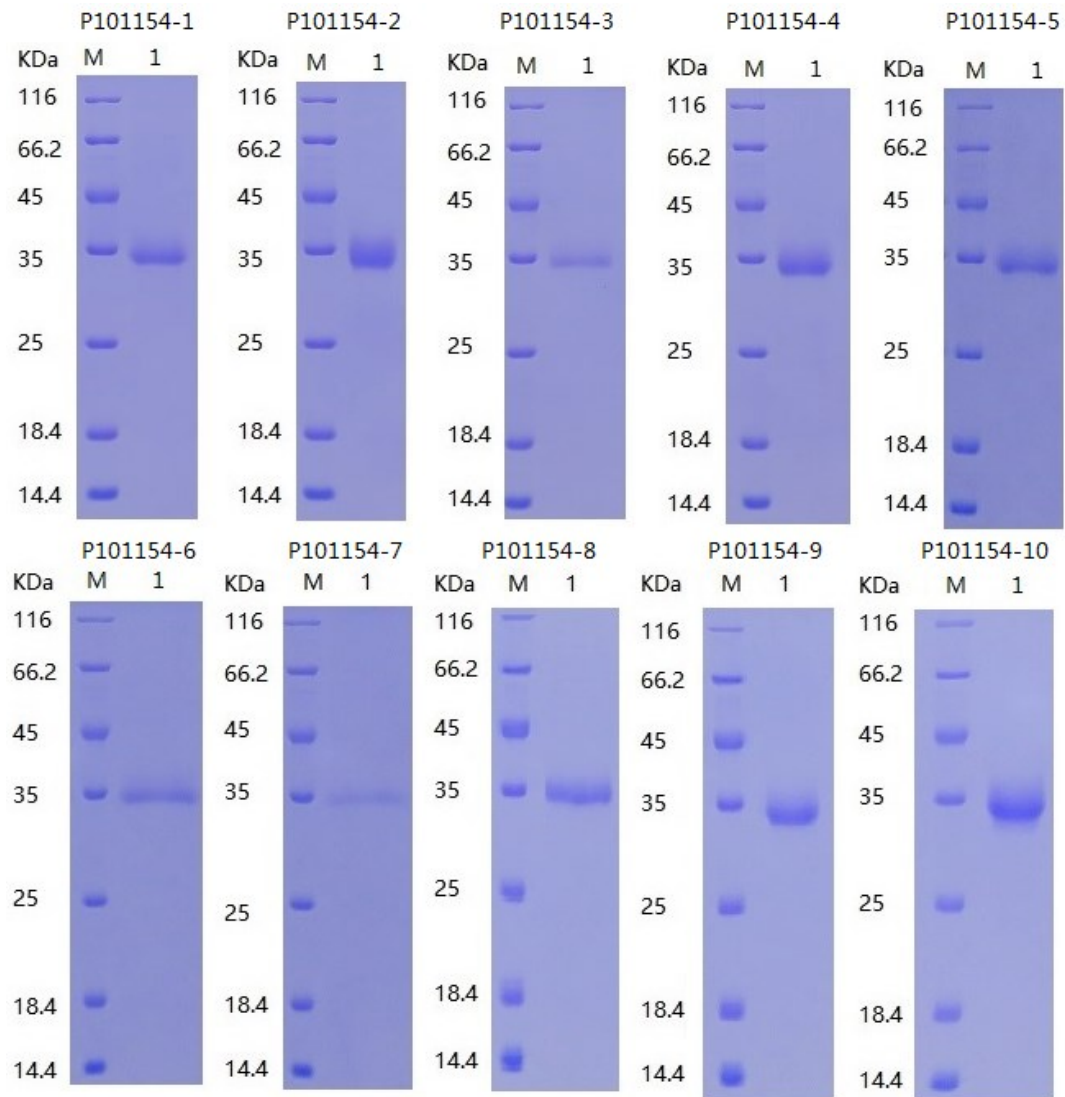

**Figure S2. SDS-PAGE result of the 10 spike protein RBD mutants. M: Protein marker. 1: Corresponding protein sample. The sample name and related mutant is shown in Table S2.**

**Table S2. SPR result of RBD-WT and 10 mutants.**

| Sample name | Protein concentration (mg/mL) | Ka (1/(M*s)) | Kd (1/s)  | KD (M)   |
|-------------|-------------------------------|--------------|-----------|----------|
| RBD-WT      | 0.25                          | 3.6677E+04   | 9.048E-04 | 2.467E-8 |
| RBD-Q498W   | 0.08                          | 6.1757E+04   | 4.363E-04 | 7.065E-9 |
| RBD-Q498R   | 0.35                          | 9.3103E+04   | 1.081E-03 | 1.161E-8 |
| RBD-T500W   | 0.06                          | 1.4307E+04   | 3.117E-04 | 2.179E-8 |
| RBD-S477H   | 0.19                          | 7.3496E+04   | 1.021E-03 | 1.389E-8 |
| RBD-Y505W   | 0.1                           | 4.0716E+04   | 6.743E-04 | 1.656E-8 |
| RBD-T500R   | 0.05                          | 6.783E+03    | 8.253E-05 | 1.217E-8 |
| RBD-N501V   | 0.05                          | 1.623E+03    | 2.572E-04 | 1.585E-7 |
| RBD-Y489W   | 0.1                           | 1.5902E+04   | 6.189E-04 | 3.892E-8 |
| RBD-Q493M   | 0.31                          | 6.2167E+04   | 4.281E-04 | 6.886E-9 |
| RBD-L455A   | 0.32                          | 1.3389E+04   | 2.789E-04 | 2.083E-8 |

Ka: association (on) rate; Kd: dissociation (off) rate; KD: binding affinity constant
